# THE AMERICAN JOURNAL OF PSYCHIATRY

---

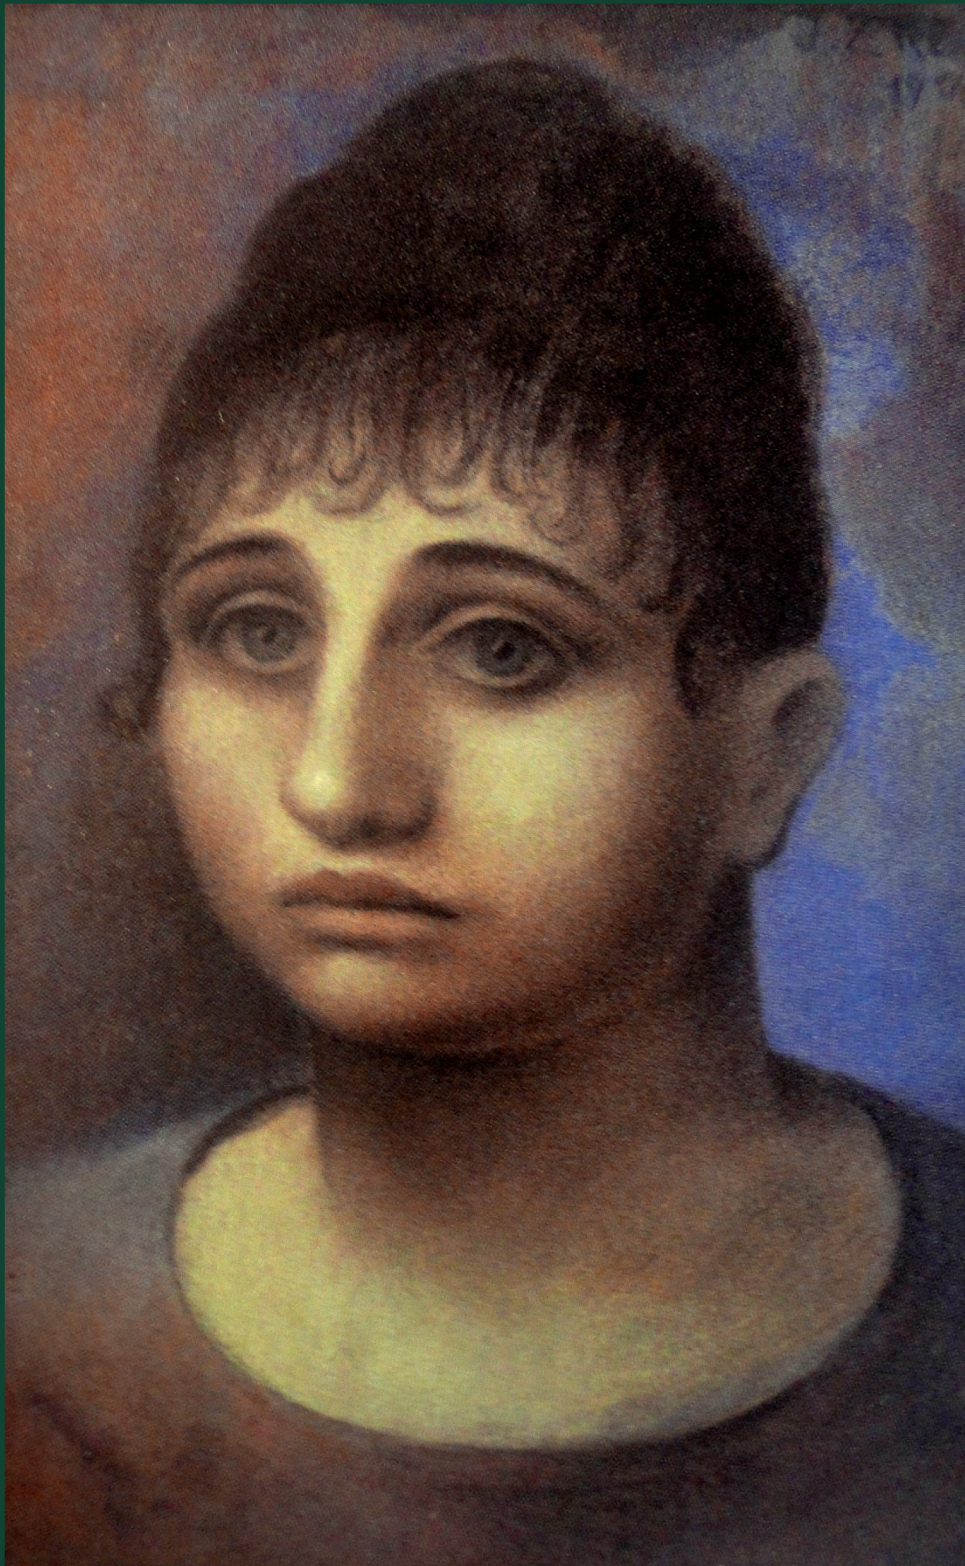

Disruptive Mood Dysregulation Disorder: A New Diagnostic Approach to Chronic Irritability in Youth

Amy Krain Roy, Ph.D., et al. 918

◀ Wandering or Unhappy Mind?

Ladislav Kesner, Ph.D. 929

Reading Deficits in Schizophrenia and Individuals at High Clinical Risk: Relationship to Sensory Function, Course of Illness, and Psychosocial Outcome

Nadine Revheim, Ph.D., et al. 949

Elevated Maternal C-Reactive Protein and Increased Risk of Schizophrenia in a National Birth Cohort

Sarah Canetta, Ph.D., et al. 960

**September 2014**

**Volume 171 • Number 9**

---

Official Journal of the  
AMERICAN PSYCHIATRIC ASSOCIATION

---

[ajp.psychiatryonline.org](http://ajp.psychiatryonline.org)
