# THE AMERICAN JOURNAL OF PSYCHIATRY

## EDITOR-IN-CHIEF

Robert Freedman, M.D.

## DEPUTY EDITORS

David A. Lewis, M.D.

Robert Michels, M.D.

Daniel S. Pine, M.D.

Susan K. Schultz, M.D.

Carol A. Tamminga, M.D.

## EDITORIAL STAFF

**Executive Editor**  
Michael D. Roy

**Senior Editor/Features Writer**  
Jane Weaver, E.L.S.

**Senior Editor**  
John J. Guardiano, Ph.D.

**Production Manager**  
Susan Westrate

**Assistant Editors**  
Katie Duffy  
Angela Moore

**Editorial Support Services  
Manager**  
Nicole Gray

**Editorial Assistant**  
Linda LaCour

**Editorial Assistant/  
Permissions Coordinator**  
Heidi Koch

**Assistants to the Editors**  
Lois Lilienthal  
Laura English  
Rachel Hogg  
Russell A. Scholl

## ASSOCIATE EDITORS

Alan Brown, M.D., M.P.H.

Linda Brzustowicz, M.D.

Tyrone Cannon, Ph.D.

Benjamin G. Druss, M.D., M.P.H.

Graham J. Emslie, M.D.

Daniel C. Javitt, M.D.

Bankole Johnson, M.D.

Ellen Leibenluft, M.D.

Douglas F. Levinson, M.D.

Constantine G. Lyketsos,  
M.D., M.H.S.

Barbara Milrod, M.D.

Jerrold F. Rosenbaum, M.D.

A. John Rush, M.D.

Patricia Suppes, M.D., Ph.D.

Anita Thapar, M.B.B.Ch.,  
F.R.C.Psych., Ph.D., F.Med.Sci.

Mauricio Tohen, M.D.,  
Dr.PH., M.B.A.

Eduard Vieta, M.D., Ph.D.

## EDITOR EMERITA

Nancy C. Andreasen, M.D., Ph.D.

## FORMER EDITORS

Amariah Brigham, M.D.  
1844-1849

T. Romeyn Beck, M.D.  
1849-1854

John P. Gray, M.D.  
1854-1886

G. Alder Blumer, M.D.  
1886-1894

Richard Dewey, M.D.  
1894-1897

Henry M. Hurd, M.D.  
1897-1904

Edward N. Brush, M.D.  
1904-1931

Clarence B. Farrar, M.D.  
1931-1965

Francis J. Braceland, M.D.  
1965-1978

John C. Nemiah, M.D.  
1978-1993

# THE AMERICAN PSYCHIATRIC ASSOCIATION

1000 Wilson Blvd., Suite 1825, Arlington, VA 22209-3901  
(888) 357-7924 (toll-free inside the U.S. and Canada) / (703) 907-7300  
web site: [www.psychiatry.org](http://www.psychiatry.org) • e-mail: [apa@psych.org](mailto:apa@psych.org)

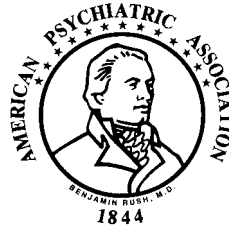

## OFFICERS 2014–2015

|                 |                        |
|-----------------|------------------------|
| President       | Paul Summergrad, M.D.  |
| President-Elect | Renée L. Binder, M.D.  |
| Treasurer       | Frank W. Brown, M.D.   |
| Secretary       | Maria A. Oquendo, M.D. |

## ASSEMBLY

|               |                                   |
|---------------|-----------------------------------|
| Speaker       | Jenny L. Boyer, M.D., Ph.D., J.D. |
| Speaker-Elect | Glenn A. Martin, M.D.             |
| Recorder      | Daniel J. Anzia, M.D.             |

## OFFICE OF THE CEO AND MEDICAL DIRECTOR

CEO and Medical Director    Saul Levin, M.D., M.P.A.

## BOARD OF TRUSTEES

|                         |                                 |                        |
|-------------------------|---------------------------------|------------------------|
| Jeffrey Akaka, M.D.     | Jeffrey L. Geller, M.D., M.P.H. | John M. Oldham, M.D.   |
| R. Scott Benson, M.D.   | Dilip V. Jeste, M.D.            | Vivian B. Pender, M.D. |
| Lara J. Cox, M.D., M.S. | Judith F. Kashtan, M.D.         | Gail E. Robinson, M.D. |
| Brian Crowley, M.D.     | Jeffrey A. Lieberman, M.D.      | Ravi N. Shah, M.D.     |
| Anita S. Everett, M.D.  | Molly K. McVoy, M.D.            | Melinda Young, M.D.    |

## PUBLISHER

Rebecca D. Rinehart

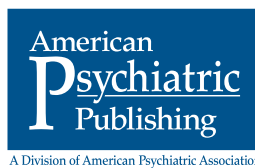

THE AMERICAN PSYCHIATRIC ASSOCIATION  
Chairpersons of Councils, Commissions, Committees, and Task Forces

Standing Committees

**Bylaws**

Rebecca W. Brendel, M.D., J.D.

**Elections**

Barry K. Herman, M.D.

**Ethics**

Richard D. Milone, M.D.

**Finance and Budget**

Alan F. Schatzberg, M.D.

*Audit*

Frank W. Brown, M.D.

*Investment Oversight*

David Fassler, M.D.

**Joint Reference**

Renée L. Binder, M.D.

**Membership**

Rahn K. Bailey, M.D.

**Nominating**

Jeffrey A. Lieberman, M.D.

**Tellers**

Hind Benjelloun, M.D.

**Council on Addiction Psychiatry**

Frances R. Levin, M.D.

**Council on Advocacy and Government Relations**

Barry B. Perlman, M.D.

*Advocacy and Litigation Funding*

Jack Drescher, M.D.

*Caucus of State Hospital Psychiatrists*

*Caucus of VA Psychiatrists*

**Council on Children, Adolescents, and Their Families**

Louis J. Kraus, M.D.

*Agnes Purcell McGavin Award*

Christopher J. McDougale, M.D.

*Blanche F. Ittleson Research Award*

*Caucus of Psychiatrists Treating Persons With Intellectual Disabilities*

*College Mental Health Caucus*

**Council on Communications**

Raymond J. DePaulo, M.D.

**Council on Geriatric Psychiatry**

Robert P. Roca, M.D.

**Council on Healthcare Systems and Financing**

Harsh K. Trivedi, M.D.

*Reimbursement for Psychiatric Care*

Bruce J. Schwartz, M.D.

*RBRVS, Codes and Reimbursement*

Ronald M. Burd, M.D.

**Council on International Psychiatry**

Dilip V. Jeste, M.D.

*Caucus on Global Mental Health and Psychiatry*

**Council on Medical Education and Lifelong Learning**

Richard F. Summers, M.D.

*APA Public Psychiatry Fellowship Selection Committee*

Christina V. Mangurian, M.D.

*APA/SAMHSA Minority Fellowship Selection and Advisory*

Altha J. Stewart, M.D.

*Caucus on MOC Issues*

*Caucus of Resident-Fellow Members*

*Scientific Program*

Philip R. Muskin, M.D.

*Scientific Program Committee of the Institute on Psychiatric Services*

Hunter L. McQuiston, M.D.

*Subcommittee on Joint Sponsorship of Continuing Medical Education (CME)*

*Vestermark Award Committee*

Jonathan F. Borus, M.D.

**Council on Minority Mental Health and Health Disparities**

Sandra C. Walker, M.D.

*Caucus of Rural Psychiatrists*

*Caucus on Religion, Spirituality and Psychiatry*

**Council on Psychiatry And Law**

Steven K. Hoge, M.D.

*Caucus of Correctional Psychiatrists*

*Isaac Ray/Human Rights Award*

Mardoche Sidor, M.D.

*Judicial Action*

Paul S. Appelbaum, M.D.

*Manfred S. Guttmacher Award*

David A. Lowenthal, M.D.

**Council on Psychosomatic Medicine (Consultation Liaison Psychiatry)**

David F. Gitlin, M.D.

**Council on Quality Care**

Joel Yager, M.D.

*Mental Health Information Technology*

Steven Roy Daviss, M.D.

*Steering Committee on Practice Guidelines*

Michael J. Vergare, M.D.

**Council on Research**

Dwight L. Evans, M.D.

*Caucus of Psychiatrists Treating Persons with Eating Disorders*

*Caucus on Alternative and Complementary Medicine*

*Psychiatric Dimensions of Disasters*

Charles R. Marmar, M.D.

*Research Awards*

B. Timothy Walsh, M.D.

*Task Force to Revise the Practice of Electroconvulsive Therapy*

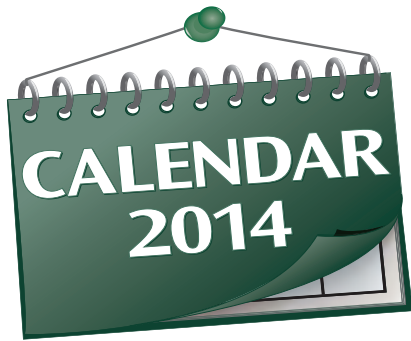

For free listing of your organization's official annual or regional meeting, please send us the following information: sponsor, location, inclusive dates, type and number of continuing education credits (if available), and the name, address, and telephone number of the person or group to contact for more information. In order for an event to appear in our listing, all notices and changes must be received at least 6 months in advance of the meeting and should be addressed to:

**Calendar, American Journal of Psychiatry, 1000 Wilson Boulevard, Suite 1825, Arlington, VA 22209-3901, [swestrate@psych.org](mailto:swestrate@psych.org) (e-mail).**

Because of space limitations, only listings of meetings of the greatest interest to Journal readers may be included.

## SEPTEMBER

**September 10–12**, The International Marcé Society for Perinatal Mental Health Conference, Swansea, Wales. [www.swansea.ac.uk/marce/](http://www.swansea.ac.uk/marce/) (web site).

## OCTOBER

**October 11–12**, 15th Joint Meeting, American Academy of Psychoanalysis and Dynamic Psychiatry (AAPDP) with Organizzazione di Psicoanalisti Italiani Federazione e Registro (OPIFER), Pisa, Italy. Contact: [info@AAPDP.org](mailto:info@AAPDP.org) (e-mail), [www.AAPDP.org](http://www.AAPDP.org) (web site).

**October 16–18**, Third International Congress on Borderline Personality Disorder and Allied Disorders (Tailoring treatments to different developmental pathways and phenomenologies), European Society for the Study of Personality Disorders (ESSPD) with International Society for the Study of Personality Disorder (ISSPD), Rome, Italy. Contact: [borderline2014@cpo-hanser.de](mailto:borderline2014@cpo-hanser.de) (e-mail), [www.esspd.eu](http://www.esspd.eu) (web site), [www.borderline-congress.org](http://www.borderline-congress.org) (conference information).

**October 30–November 2**, 66th Institute on Psychiatric Services, San Francisco, CA. [www.psychiatry.org/ips](http://www.psychiatry.org/ips) (web site).

## FEBRUARY 2015

**February 16–19**, Update on Psychiatry: Continuing a Proud 23 Year Tradition. JW Marriott Starr Pass Resort, Tucson, Arizona. Sponsored by: Univ. of Arizona College of Medicine, Department of Psychiatry; Arizona Psychiatric Society; Arizona Psychological Association. Contact: [uapsycon@email.arizona.edu](mailto:uapsycon@email.arizona.edu) (e-mail); (520) 626-1392 (phone); [www.psychopharm.arizona.edu](http://www.psychopharm.arizona.edu) (web site).

## An essential digital companion to the DSM-5®

*NEW! – Now Spanish language supported!*

### DSM-5® Diagnostic Criteria Mobile App

American Psychiatric Association

The **DSM-5® Diagnostic Criteria Mobile App** is designed to help mental health practitioners, researchers and students fully integrate the new DSM criteria and codes into their practice and study. Users have full offline access to all of the criteria sets as well as online access to supporting videos, commentary and resources. Powerful search and customization tools aid and enhance assessment of symptom presentations in a variety of clinical and administrative settings. It features:

- Access to the complete DSM-5® diagnostic criteria sets on your phone and tablet
- Up to date access to ICD-9-CM and ICD-10-CM codes for clinical and administrative use
- Video commentary from the DSM-5 task force members highlighting changes from DSM-IV to DSM-5
- Robust disorder, acronym, code and symptom search functionality
- Bookmarking allows customization of the criteria sets most commonly referenced

Available for both iOS and Android compatible devices through the iTunes store and Google Play.

As the DSM-5® Diagnostic Criteria Mobile App is only available for sale through the iTunes and Android stores, it is not possible for us to extend our traditional APA Member or APA Resident-Fellow Member discounts on the purchase of this product.

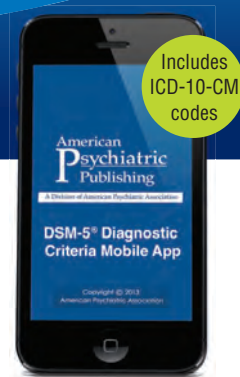

# There's So Much More to AJP Than Meets the Page!

Visit *The American Journal of Psychiatry's* website on PsychiatryOnline for the following features!

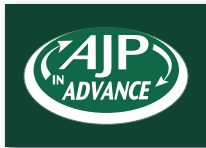

## AJP in Advance

The very latest research advances!

At **AJP in Advance**, you can discover the following before their appearance in print:

### Glutamate Metabolism in Major Depressive Disorder

Research on novel treatments for major depressive disorder focuses quite deeply on glutamate function, and this research would benefit from a brain-imaging technique that precisely quantified glutamate function. Abdallah and colleagues use novel, state-of-the-art techniques to address this issue. Their findings reveal signs of a specific form of glutamate-related dysfunction that could be targeted by novel therapies.

### Methylene Blue for Fear Extinction in Adults With Claustrophobia

Administering methylene blue, a memory-enhancing agent, after successful exposure therapy promoted the retention of fear extinction in claustrophobic patients, but clinicians should carefully consider what level of fear reduction was achieved in session to avoid harmful effects.

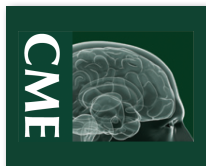

## AJP CME

Three articles in this issue form the basis of a short course with questions that can be answered for up to 1 *AMA PRA Category 1 Credit™* each by visiting <http://psychiatryonline.org/cme.aspx> and clicking on the "American Journal of Psychiatry" tab.

CME credit is issued only online, and a paid subscription to AJP CME course program is required. This month's courses appear on pages 1019–1022.

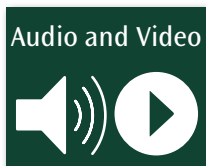

Audio and Video

## Have You Heard?

With AJP Audio you can listen to highlights of this issue. This month, Deputy Editor Susan K. Schultz, M.D., discusses diagnostic and treatment aspects of the new diagnosis disruptive mood dysregulation disorder, predictors of long-term outcome in youths with bipolar disorder, reading ability in schizophrenia, the relation of mood-related impulsivity to aggression in schizophrenia, maternal levels of C-reactive protein and schizophrenia risk, and major depression in a woman in Uganda. Also, visit the online edition of this month's Journal and click "In This Issue" to view a video of Deputy Editor Daniel S. Pine, M.D., presenting highlights from the issue.

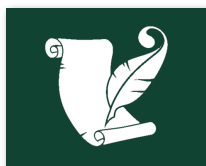

## Revisit the field's rich history!

### 25 years ago this month: Managed Health Care and the Massachusetts Experience

"Managed health care, through prepaid health delivery systems and utilization review organizations, is perhaps the greatest trend in modern health care. The authors examine the remarkable growth of managed care and outline its clinical, economic, ethical, and practical implications. They then review examples of how organized psychiatry has been involved in managed care and describe the efforts to date of the Massachusetts Psychiatric Society in this area. Managed care is here to stay. The future climate of psychiatric practice and the care available to psychiatric patients are dependent on informed and organized activities by psychiatrists and their local and national representatives."

# The *Residents'* JOURNAL

## THE AMERICAN JOURNAL OF **PSYCHIATRY** RESIDENTS' JOURNAL

July 2014

Volume 9

Issue 7

### Inside

- 2 **Pushing Boundaries**  
Misty Richards, M.D., M.S.
- 3 **Treatment of Bipolar Disorder and Psychotic Disorders During Pregnancy**  
Amritha Bhat, M.B.B.S., M.D.
- 6 **Biomarkers in Psychopharmacology: The Present and Future**  
Nilesh S. Tannu, M.D., M.S.
- 7 **Perspectives in the Pharmacological Treatment of Bipolar Disorder: Where Are We Heading?**  
Marsal Sanches, M.D., Ph.D.
- 11 **Serotonin Reuptake Inhibitor Discontinuation Symptoms**  
Leah C. Susser, M.D.
- 14 **Chronotherapy: When the Tincture of Time is Potent Medicine**  
Mark A. Oldham, M.D.
- 17 **N-Acetylcysteine in Psychiatry: Panacea or Placebo?**  
Swapnil Gupta, M.B.B.S., M.D.
- 20 **Medical Marijuana: A Review for the Psychiatric Trainee**  
Samuel T. Wilkinson, M.D.
- 24 **Residents' Resources**

### In This Issue

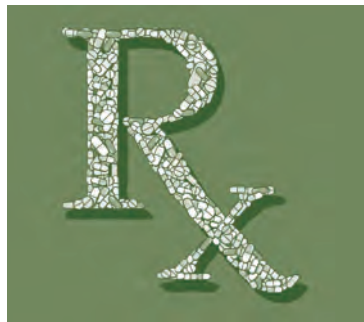

This issue of the *Residents' Journal* focuses on the theme of psychopharmacology and therapeutics. In a review article, Amritha Bhat, M.B.B.S., M.D., summarizes available data on the use of psychopharmacological treatment for bipolar disorder and other psychiatric disorders during pregnancy. Nilesh S. Tannu, M.D., M.S., discusses biomarkers in psychopharmacology and how they may impact patient care and the long-term goal of individualized medicine. Marsal Sanches, M.D., Ph.D., provides an overview of perspectives in the medication management of bipolar disorder. Leah C. Susser, M.D., examines the symptoms of serotonin reuptake inhibitor discontinuation. Mark A. Oldham, M.D., presents data on the use of chronotherapy for mood and neurocognitive disorders. Swapnil Gupta, M.B.B.S., M.D., provides a synopsis of the mechanisms of action, therapeutic efficacy, and practical considerations of N-acetylcysteine in psychiatric treatment. Last, Samuel T. Wilkinson, M.D., presents data on the unique legal status of marijuana for medical use, highlighting the indications as well as risks.

Editor-in-Chief  
Misty Richards, M.D., M.S.

Senior Deputy and Guest Section Editor  
Rajiv Radhakrishnan, M.B.B.S., M.D.

Deputy Editor  
Tobias Wasser, M.D.

Associate Editors  
Ijeoma Chukwu, M.D., M.P.H.  
Kathleen Mary Patchan, M.D.

Media Editor  
Holly S. Peek, M.D., M.P.H.

Staff Editor  
Angela Moore

Editors Emeriti  
Sarah B. Johnson, M.D.  
Molly McVoy, M.D.  
Joseph M. Cerimela, M.D.  
Sarah M. Fayad, M.D.  
Monifa Seawell, M.D.  
Arshya Vahabzadeh, M.D.

### Editor-in-Chief

Misty Richards, M.D., M.S.

### Senior Deputy Editor

Rajiv Radhakrishnan, M.B.B.S., M.D.

### Deputy Editor

Tobias Wasser, M.D.

### Associate Editors

Ijeoma Chukwu, M.D., M.P.H.

Kathleen Mary Patchan, M.D.

### Media Editor

Holly S. Peek, M.D., M.P.H.

*The Residents' Journal* accepts manuscripts authored by medical students, resident physicians, and fellows. To submit your paper, please visit the manuscript submission site at [mc.manuscriptcentral.com/appi-ajp](http://mc.manuscriptcentral.com/appi-ajp) and either create an account or use your existing account. For manuscript type, select "Residents." Then follow the instructions to upload your manuscript. Residents who are interested in participating as Guest Section Editors should e-mail *The Residents' Journal* Editor-in-Chief Misty Richards at [misty.richards@gmail.com](mailto:misty.richards@gmail.com).

*The Residents' Journal* is sent free-of-charge to all psychiatry residents. Anyone interested in being included on the distribution list should contact Angela Moore, *The Residents' Journal* staff editor at [ajp@psych.org](mailto:ajp@psych.org) with "Subscribe to Residents' Journal" in the subject line.

To access the complete *Residents' Journal* archives, visit [ajp.psychiatryonline.org/residents\\_journal.aspx](http://ajp.psychiatryonline.org/residents_journal.aspx)



## Contents

- A5 Editorial Board  
A7 Highlights of this issue

## Editorials

- 83 **Can electronic monitoring (GPS 'tracking') enhance risk management in psychiatry?**  
J. Tully, D. Hearn and T. Fahy

- 85 **Jealousy in *The Winter's Tale* – in 100 words**  
Trevor Turner

- 86 **Preventing 'deaths by indifference': identification of reasonable adjustments is key**  
I. Tuffrey-Wijne and S. Hollins

## Review article

- 88 **Duration of untreated psychosis as predictor of long-term outcome in schizophrenia: systematic review and meta-analysis**  
M. Penttilä, E. Jääskeläinen, N. Hirvonen, M. Isohanni and J. Miettunen

- 94 **Symeon the Holy Fool: patron of the mentally ill – psychiatry and sacred texts**  
Fernando Espí Forcén and Carlos Espí Forcén

## Papers

- 95 **Prenatal exposure to selective serotonin reuptake inhibitors and social responsiveness symptoms of autism: population-based study of young children**  
H. El Marroun, T. J. H. White, N. J. F. van der Knaap, J. R. Homberg, G. Fernández, N. K. Schoemaker, V. W. V. Jaddoe, A. Hofman, F. C. Verhulst, J. J. Hudziak, B. H. C. Stricker and H. Tiemeier

- 102 ***Man's Search for Meaning* by Victor Frankl – reflection**  
Jeremy Holmes

- 103 **Living with uncertainty: antidepressants and pregnancy**  
I. Jones and L. McDonald

- 105 **Prenatal exposure to selective serotonin reuptake inhibitors and autistic symptoms in young children: another red herring?**  
I. Petersen, S. Evans and I. Nazareth

- 107 **Parent-child interaction and oxytocin production in pre-schoolers with autism spectrum disorder**  
R. Feldman, O. Golan, Y. Hirschler-Guttenberg, S. Ostfeld-Etzion and O. Zagoory-Sharon

- 113 **Effect of polygenic risk scores on depression in childhood trauma**  
W. J. Peyrot, Y. Milaneschi, A. Abdellaoui, P. F. Sullivan, J. J. Hottenga, D. I. Boomsma and B. W. J. H. Penninx

- 120 **Developmental model of suicide trajectories**  
M. Séguin, G. Beauchamp, M. Robert, M. DiMambro and G. Turecki

- 127 **First-contact incidence of psychosis in north-eastern Italy: influence of age, gender, immigration and socioeconomic deprivation**

A. Lasalvia, C. Bonetto, S. Tosato, G. Zanatta, D. Cristofalo, D. Salazzari, L. Lazzarotto, M. Bertani, S. Bissoli, K. De Santi, C. Cremonese, M. De Rossi, F. Gardellin, L. Ramon, M. Zucchetto, F. Amaddeo, M. Tansella, M. Ruggeri and the PICOS-Veneto Group

- 135 **Aripiprazole once-monthly for treatment of schizophrenia: double-blind, randomised, non-inferiority study**

W. W. Fleischhacker, R. Sanchez, P. P. Perry, N. Jin, T. Peters-Strickland, B. R. Johnson, R. A. Baker, A. Eramo, R. D. McQuade, W. H. Carson, D. Walling and J. M. Kane

- 145 **Vocational rehabilitation in early psychosis: cluster randomised trial**

T. Craig, G. Shepherd, M. Rinaldi, J. Smith, S. Carr, F. Preston and S. Singh

- 150 **Suicide in the Trenches – poem**  
Siegfried Sassoon

- 151 **Associations between common mental disorders and sexual dissatisfaction in the general population**  
I. Vanwesenbeeck, M. ten Have and R. de Graaf

## Columns

- 158 Correspondence  
164 Correction  
164 Retraction  
165 Contents of the *American Journal of Psychiatry*  
166 Kaleidoscope  
167 Contents of *Advances in Psychiatric Treatment*  
168 From the Editor's desk

## Cover picture

*Sea of Faces* (c.1935). Madge Gill (1882–1961). Coloured and black ink on paper.

Madge Gill, who spent her early days under the care of Dr Barnardos, lived in the East End of London. In her mid-30s, after losing her son and unborn daughter and suffering cancer of the eye, she had a mental breakdown. Following this, she suddenly began creating works of art, claiming she was guided by a spirit called 'Myrminerest'. She exhibited her work in the Whitechapel Gallery, which is just a short distance from the new London headquarters of the Royal College of Psychiatrists. She has subsequently been hailed as an 'outsider artist' and her work was recently the subject of a major retrospective at the Orleans House Gallery. According to the psychiatric notes during her admission to the Lady Chichester Hospital for Women and Children in Hove, she heard voices and saw visions. However, apart from this one admission, she lived the rest of her life outside psychiatric hospitals, and spent her time endlessly producing artworks and practising as a medium. Like other outsider artists, notably Adolf Wolfli, Gill's work consists of dense patterning which fills the whole picture, a characteristic called *horror vacui*, or fear of empty spaces.

## Allan Beveridge

Image courtesy of London Borough of Newham Heritage and Archives.

We are always looking for interesting and visually appealing images for the cover of the *Journal* and would welcome suggestions or pictures, which should be sent to Dr Allan Beveridge, British Journal of Psychiatry, 21 Prescot Street, London E1 8BB, UK or [bjp@rcpsych.ac.uk](mailto:bjp@rcpsych.ac.uk).

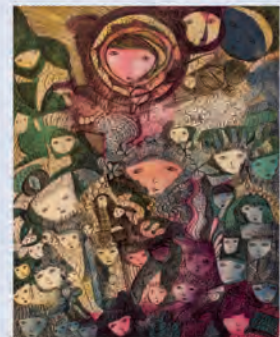

## IN THIS ISSUE

### REVIEW

#### Neuroimaging studies of depressive disorders in China since 2000

Yingying YIN, Yonggui YUAN

doi: <http://dx.doi.org/10.3969/j.issn.1002-0829.2014.03.002>

### ORIGINAL ARTICLES

#### Two-year prospective case-controlled study of a case management program for community-dwelling individuals with schizophrenia

Meijuan CHEN, Guojun WU, Zuwei WANG, Jun YAN, Jianfang ZHOU, Yan DING, Yaqin JIANG, Shunzeng RAO, Qing ZHOU, Hua NI, Jun ZHAO, Yanli SU, Jun HU, Yi ZHANG, Zhenghui YI, Weimin YANG, Lisheng SONG

doi: <http://dx.doi.org/10.3969/j.issn.1002-0829.2014.03.003>

#### Changes in behavior and in brain glucose metabolism in rats after nine weeks on a high fat diet: a randomized controlled trial

Hua HU, Yeqing XU, Chunfeng LIU, Heqing ZHAO, Hong ZHANG, Liwei WANG

doi: <http://dx.doi.org/10.3969/j.issn.1002-0829.2014.03.004>

#### Retrospective assessment of factors associated with readmission in a large psychiatric hospital in Guangzhou, China

Yanling ZHOU, Robert A. ROSENHECK, Somaia MOHAMED, Ni FAN, Yuping NING, Hongbo HE

doi: <http://dx.doi.org/10.3969/j.issn.1002-0829.2014.03.005>

#### Retrospective assessment of the prevalence of cardiovascular risk factors among homeless individuals with schizophrenia in Shanghai

Qing CHEN, Min WAN, Chunxia BAN, Yafang GAO

doi: <http://dx.doi.org/10.3969/j.issn.1002-0829.2014.03.006>

### RESEARCH CORNER

#### Use of diplotypes – matched haplotype pairs from homologous chromosomes – in gene-disease association studies

Lingjun ZUO, Kesheng WANG, Xingguang LUO

doi: <http://dx.doi.org/10.3969/j.issn.1002-0829.2014.03.009>

### FORUM

#### Opportunities and challenges for promoting psychotherapy in contemporary China

Xudong ZHAO

doi: <http://dx.doi.org/10.3969/j.issn.1002-0829.2014.03.007>

### CASE REPORT

#### Case report of comorbid alcohol-induced psychotic disorder and Madelung's Disease

Zhenxiao SUN, Huanjun LI

doi: <http://dx.doi.org/10.3969/j.issn.1002-0829.2014.03.008>

### BIOSTATISTICS IN PSYCHIATRY (21)

#### Item response theory for measurement validity

Frances M. YANG, Solon T. KAO

doi: <http://dx.doi.org/10.3969/j.issn.1002-0829.2014.03.010>
